# Supplementary material for: Teaching Nature and Architecture: Student-Led Account of Biomimicry Innovations in the Tropics
Source: MDPI journal article supplement (doi:10.3390/biomimetics8010013), 2023-01-01
Supplement: s1 [file s1]

## Supplementary Materials

# Nature & Architecture: Student-led Biomimicry Innovations in the tropics

Girirajan Arumugam <sup>1</sup>, Siti Norzaini Zainal Abidin <sup>1</sup>, Camelia May Li Kusumo <sup>1</sup> and Anuj Jain <sup>1,2,\*</sup>

<sup>1</sup> School of Architecture, Building and Design, Taylor's University, Malaysia; giribarch@gmail.com (G.A.); sitinorzaini.zainalabidin@taylors.edu.my (S.Z.); cameliamayli.kusumo@taylors.edu.my (C.K.)

<sup>2</sup> Biomimicry Singapore Network and bioSEA Pte. Ltd., 68 Chestnut Avenue, Singapore; anuj@biosea.sg (A.J.)

\* Correspondence: anuj@biosea.sg (A.J.)

## SUPPLEMENTARY MATERIALS

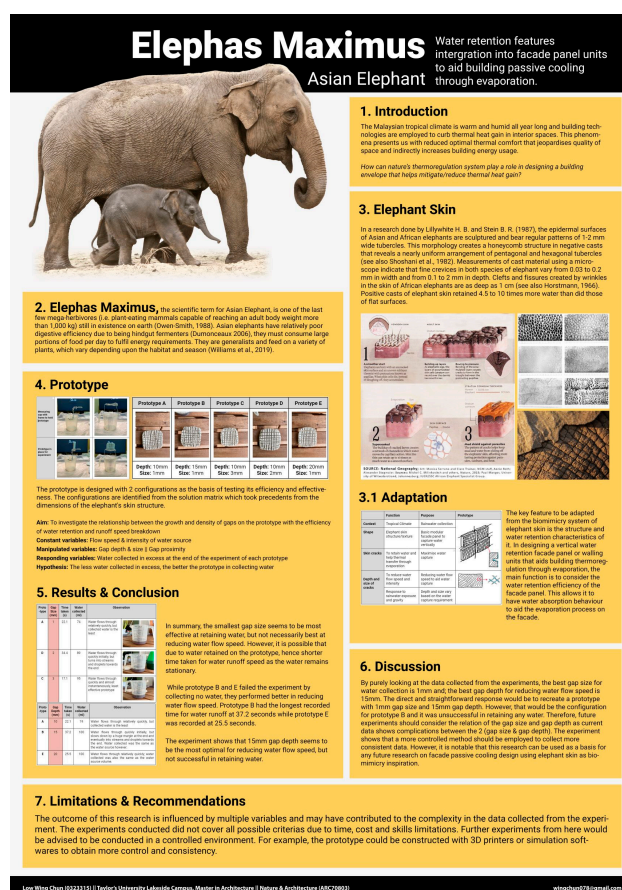

**Figure S1:** Student poster on mimicking the elephant skin texture facades for thermoregulation - (Chun, 2022)

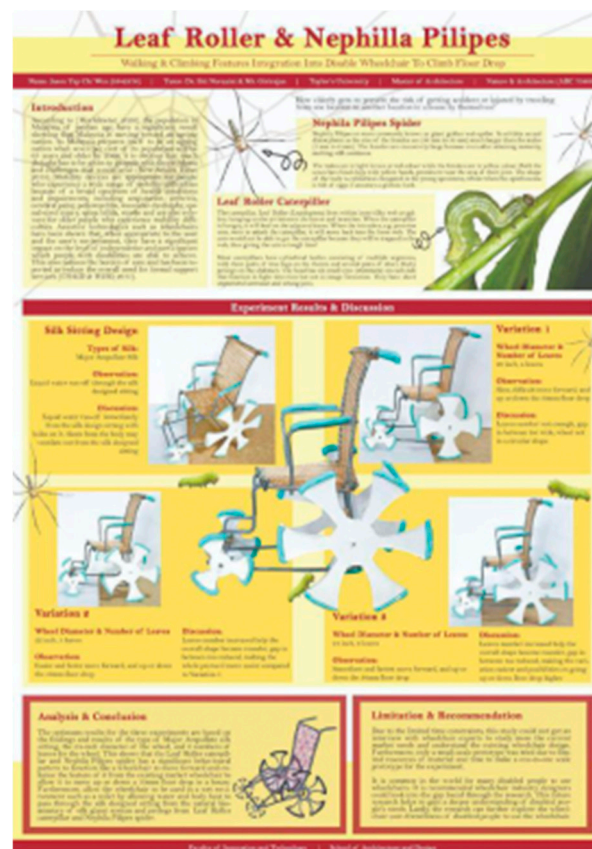

**Figure S2:** Student poster on mimicking the Leaf Roller and Orb Web Spider *Nephilla pilipes* for better transport and mobility - (Wen, 2022)

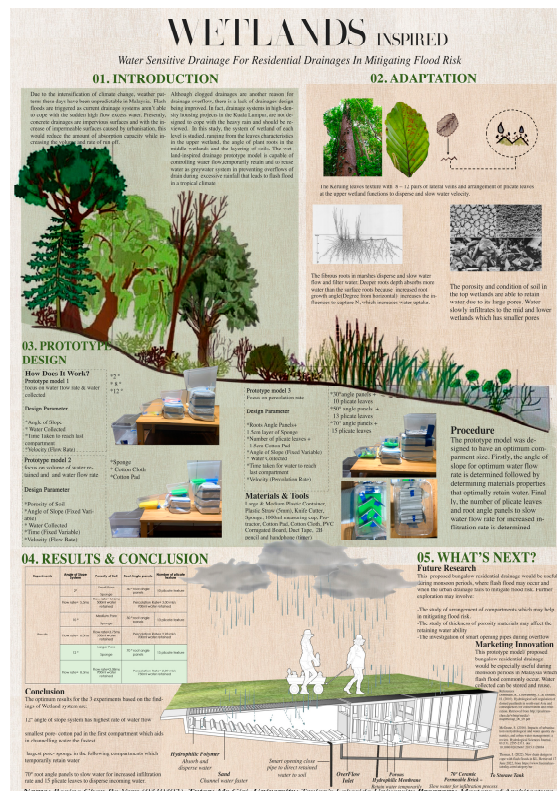

**Figure S3:** Student poster on mimicking wetlands for better water management - (Vern, 2022)

| System / Condition                              | Biological System                                                                                                                                                                                                                                                                                                                                                                                                                                                                                                                                                                                                                                                                                                                                      | Man-made System                                                                                                                                                                                                                                                                                                                                                                                                                       |
|-------------------------------------------------|--------------------------------------------------------------------------------------------------------------------------------------------------------------------------------------------------------------------------------------------------------------------------------------------------------------------------------------------------------------------------------------------------------------------------------------------------------------------------------------------------------------------------------------------------------------------------------------------------------------------------------------------------------------------------------------------------------------------------------------------------------|---------------------------------------------------------------------------------------------------------------------------------------------------------------------------------------------------------------------------------------------------------------------------------------------------------------------------------------------------------------------------------------------------------------------------------------|
| <b>Mimosa Pudica</b><br><b>Normal condition</b> | <br>Under normal condition, leaflets are wide open (approx. 160°).<br><br>Section of leaflet & pulvinus<br>Pulvinus upper cell<br>Before stimulated, presence of large central vacuole & aquaporin channels can be found in upper cell of pulvinus. While in the lower cell, large central vacuole is without, without aquaporin channels.                                                                                                                                                                                                                                           | <br><br>In this device, combination of magnetic system and spring are used to mimic the function of pulvinus.<br>Under normal condition, flaps are wide open (approx. 160°), as a sun shading device.                                                             |
| <b>Stimulated condition</b>                     | <br>Seismonastic movement happens ~ immediate closing of leaflets upon stimulation.<br><br>Section of leaflet & pulvinus<br>Pulvinus upper cell<br>After stimulated, an obvious shrinkage of central vacuole & absence of aquaporin channels can be seen in upper cell of pulvinus. While at the lower cell, size of central vacuole is increased.<br>This shows that, after stimulated, water contains in the upper cell is drained out, thus the closing of leaflets.<br>The upper side of pulvinus controls the leaflet movement while the lower side is relatively insensitive. | <br><br>After stimulated (by rain), the magnetic field will be activated, pulling the flap downward (approx. 80°), forming a rainwater channel. Once the magnetic field deactivated (after rain), the spring will push the flap upward to the original condition. |

**Figure S4:** Student poster on mimicking *Mimosa Pudica* leaves for better daylighting - (Yin, 2017)

[illegible]

**Figure S5:** Student poster on mimicking Bat's Wing for temporary structure - (Meng, 2021)
